# Supplementary material for: Upgrading the quality of Africa's rice: a novel artisanal parboiling technology for rice processors in sub‐Saharan Africa
Source: PubMed Central journal article supplement (PMC4708646; doi:10.1002/fsn3.242), 2015-05-22
Supplement: FSN3-3-557-s001.pdf [file FSN3-3-557-s001.pdf]

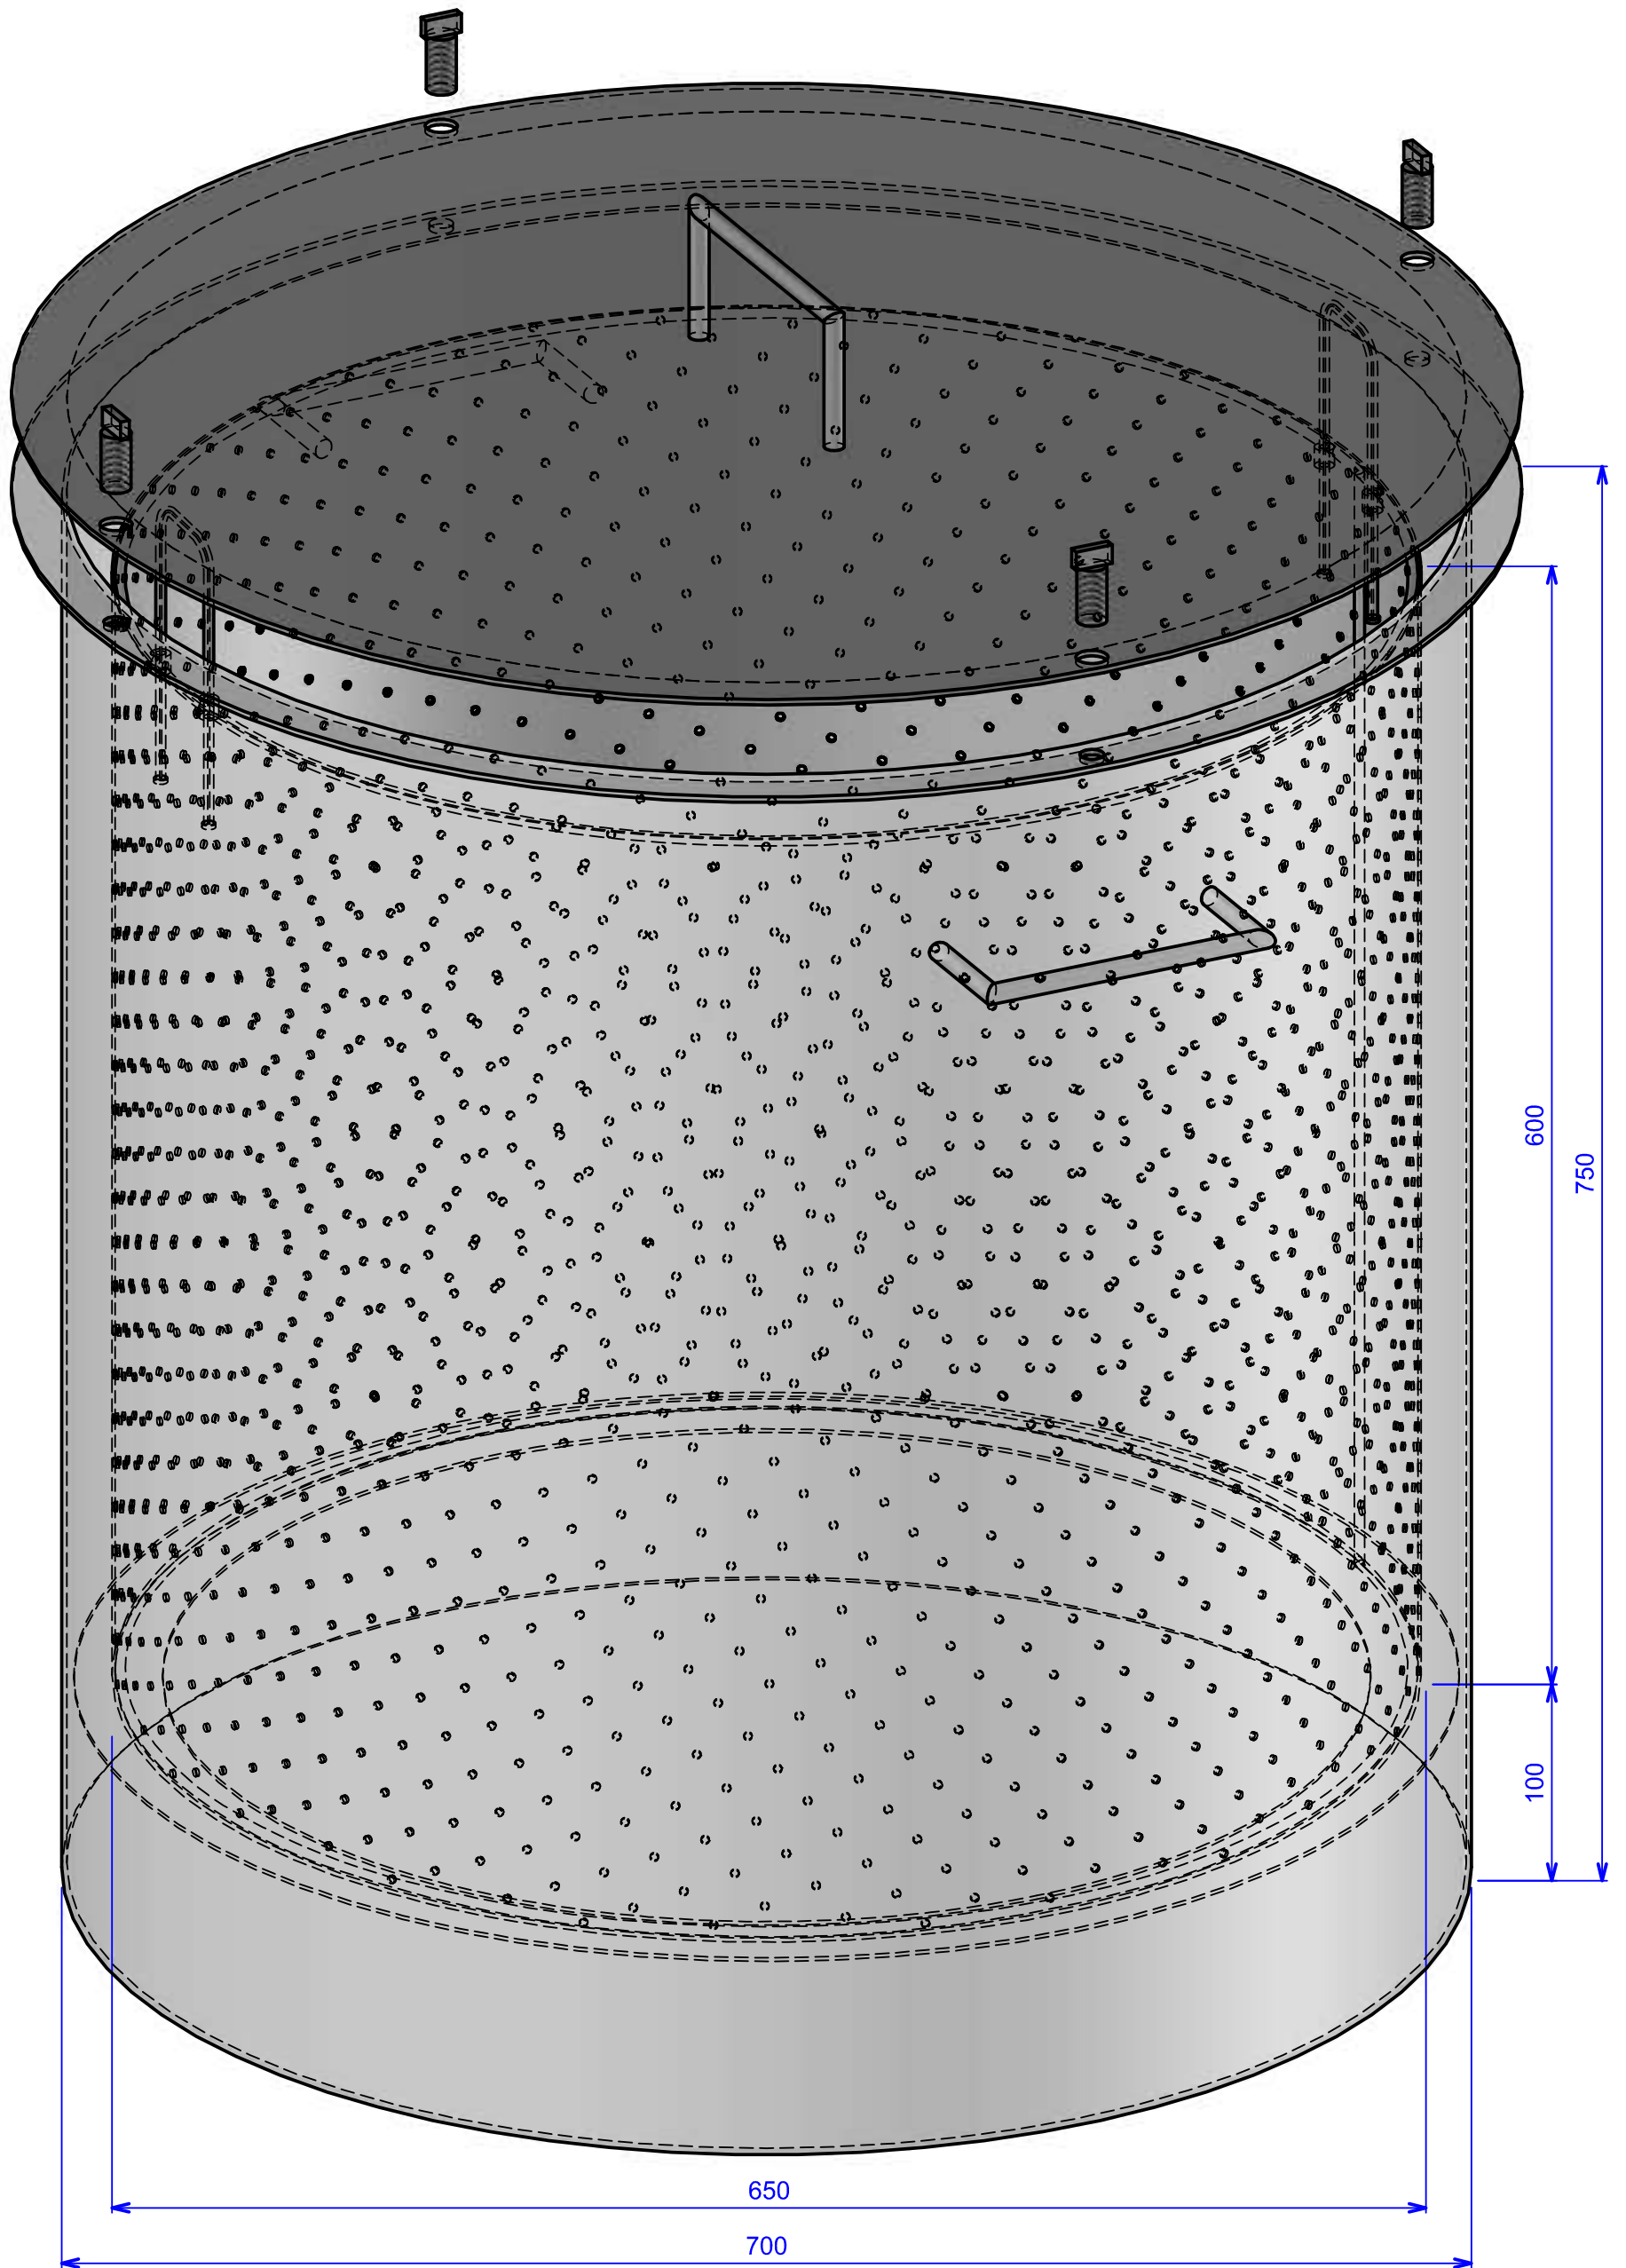

|        |                     |            |  |    |
|--------|---------------------|------------|--|----|
| SCALE  | GEM PARBOILING UNIT | NUMBER 1   |  |    |
| 3 : 10 |                     | DATE       |  |    |
|        |                     | 15/09/2014 |  |    |
|        |                     |            |  |    |
| A3     |                     |            |  | 01 |



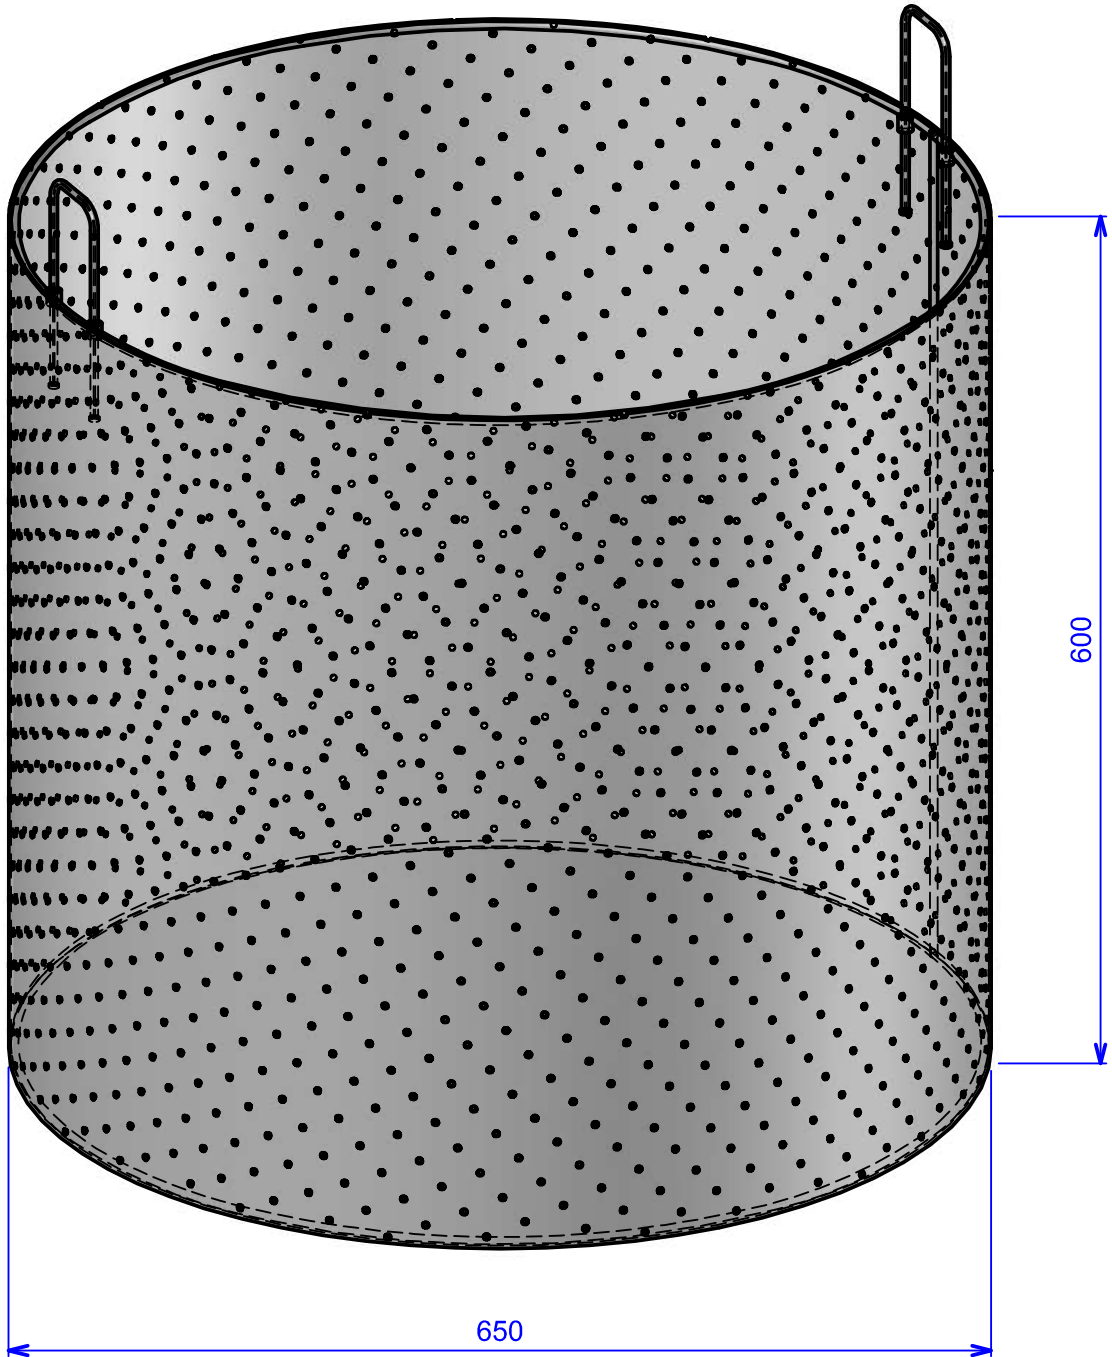

|                                                                                     |        |            |  |    |
|-------------------------------------------------------------------------------------|--------|------------|--|----|
| SCALE                                                                               | BASKET | NUMBER 3   |  |    |
| 2 : 10                                                                              |        | DATE       |  |    |
|                                                                                     |        | 15/09/2014 |  |    |
|  |        |            |  |    |
| A4                                                                                  |        |            |  |    |
|                                                                                     |        |            |  | 03 |

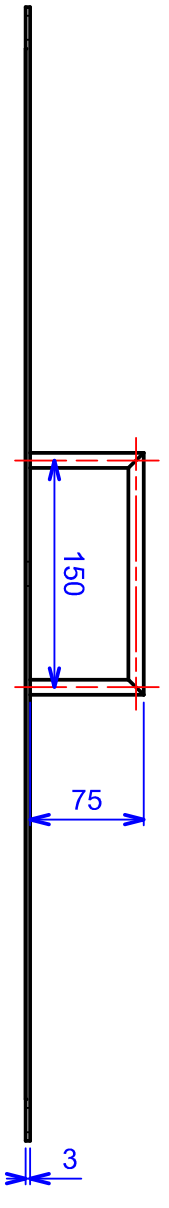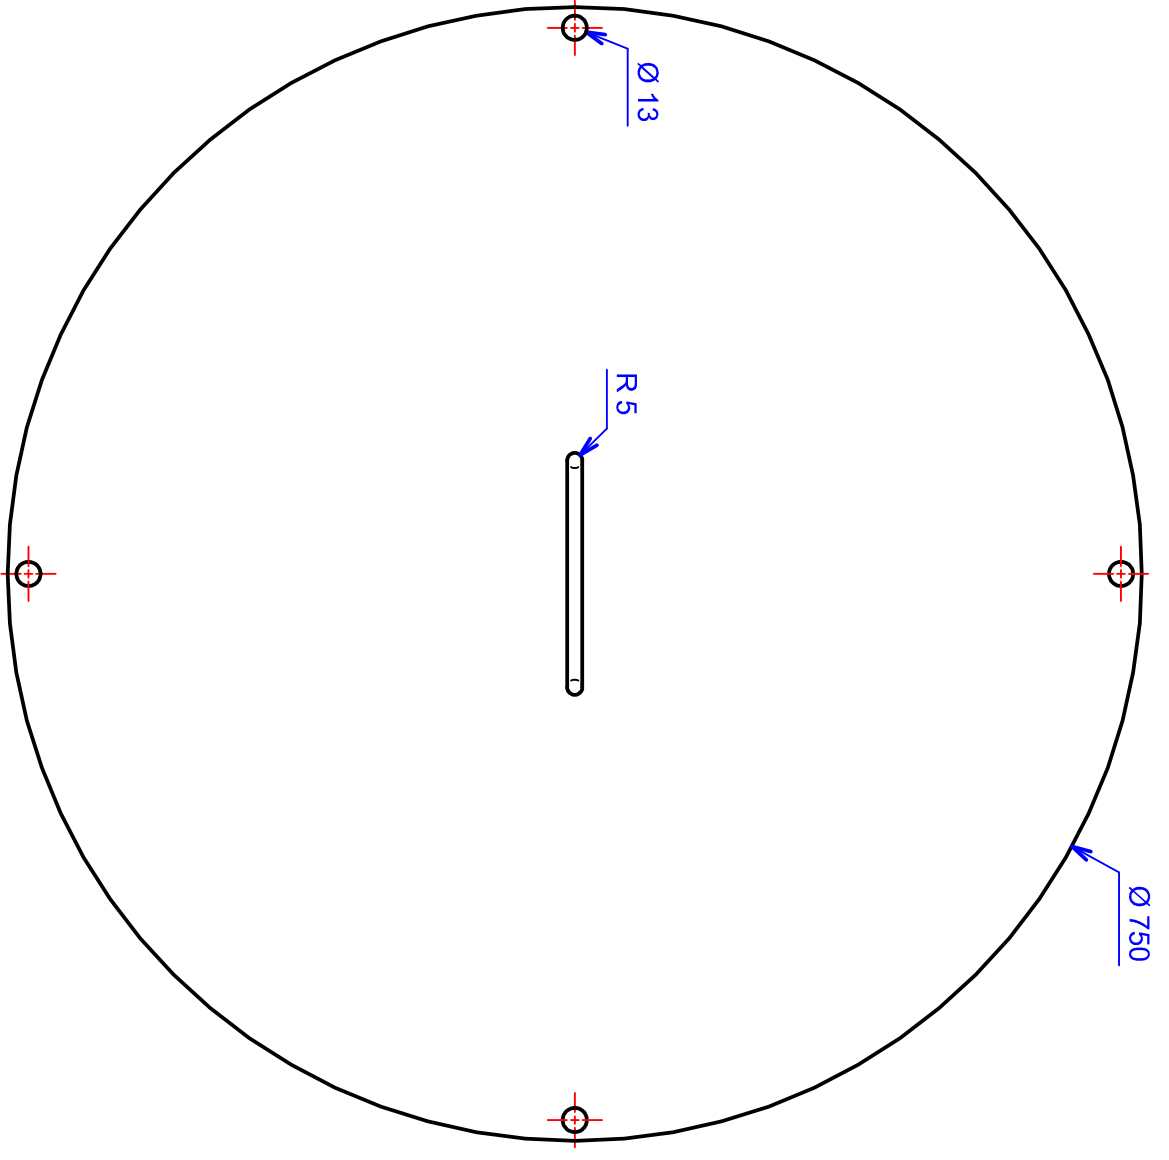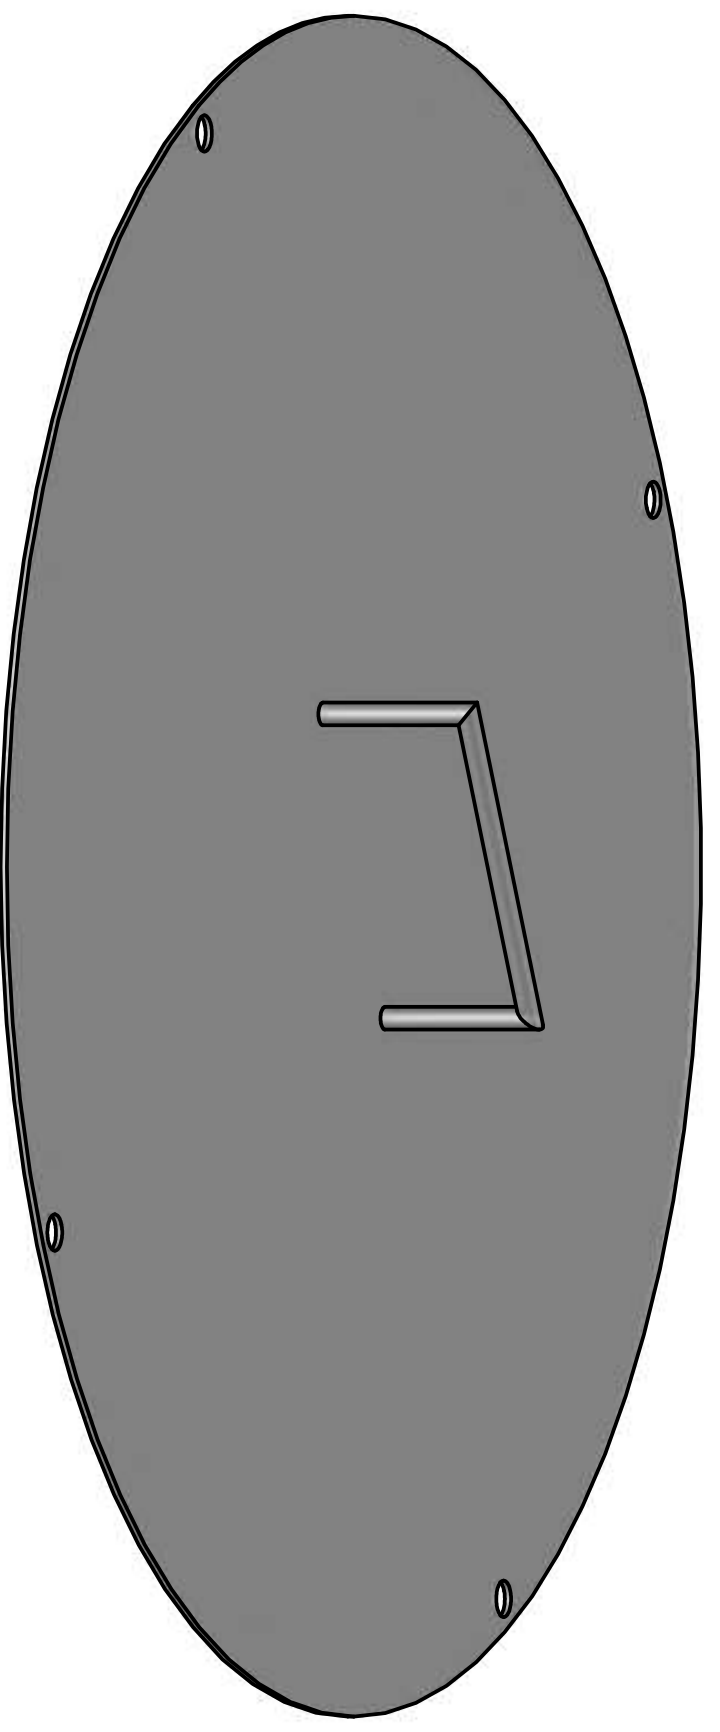

|       |  |           |  |            |  |  |    |
|-------|--|-----------|--|------------|--|--|----|
| SCALE |  | NUMBER 4  |  |            |  |  |    |
| 3:10  |  | HEAVY LID |  | DATE       |  |  |    |
|       |  |           |  | 15/09/2014 |  |  |    |
| A3    |  |           |  |            |  |  | 04 |
